# Supplementary material
Source: PubMed Central journal article supplement (PMC3295542)
Supplement: NIHMS356824-supplement-1_si_001.pdf [file NIHMS356824-supplement-1_si_001.pdf]

# Study of Interaction Energies between PAMAM Dendrimer and non-Steroidal Anti-Inflammatory

## Drug Using a Distributed Computational Strategy and Experimental Analysis by ESI-MS/MS.

Fabián Avila-Salas, Claudia Sandoval, Julio Caballero, Sergio Guíñez-Molinos, Leonardo S. Santos,

Raúl E. Cachau, and Fernando D. González-Nilo

### SUPPLEMENTARY TABLES

**Table S1.** Energy information obtained for the complexes formed by the fragment  $n_1$  of PAMAM dendrimer and 4 NSAIDs.

| drug       | complex (drug + fragment)              |                                    |                                     |                                     | drug<br>$\Delta H_f$<br>drug<br>kcal/mol | fragment $n_1$<br>$\Delta H_f$<br>fragment<br>kcal/mol | interaction energy <sup>b</sup> | experimental values |
|------------|----------------------------------------|------------------------------------|-------------------------------------|-------------------------------------|------------------------------------------|--------------------------------------------------------|---------------------------------|---------------------|
|            | dispersion<br>contribution<br>kcal/mol | h-bond<br>contribution<br>kcal/mol | $\Delta H_f$<br>complex<br>kcal/mol | $\Delta H_f^a$<br>final<br>kcal/mol |                                          |                                                        |                                 |                     |
| Naproxen   | -15,52                                 | -4,45                              | 47,58                               | 27,61                               | -39,75                                   | 242,78                                                 | -175,41                         | 0                   |
| Ketoprofen | -15,36                                 | -5,42                              | 71,60                               | 50,82                               | -21,30                                   | 242,78                                                 | -170,65                         | 1,1                 |
| Ibuprofen  | -14,90                                 | -5,05                              | 53,53                               | 33,58                               | -42,19                                   | 242,78                                                 | -167,00                         | 2,1                 |
| Diflunisal | -14,26                                 | -6,70                              | -23,48                              | -44,43                              | -126,42                                  | 242,78                                                 | -160,78                         | 2,5                 |

**Table S2.** Energy information obtained for the complexes formed by the fragment  $n_2$  of PAMAM dendrimer and 4 NSAIDs.

| drug       | complex (drug + fragment)              |                                    |                                     |                                     | drug<br>$\Delta H_f$<br>drug<br>kcal/mol | fragment $n_2$<br>$\Delta H_f$<br>fragment<br>kcal/mol | interaction energy <sup>b</sup> | experimental values |
|------------|----------------------------------------|------------------------------------|-------------------------------------|-------------------------------------|------------------------------------------|--------------------------------------------------------|---------------------------------|---------------------|
|            | dispersion<br>contribution<br>kcal/mol | h-bond<br>contribution<br>kcal/mol | $\Delta H_f$<br>complex<br>kcal/mol | $\Delta H_f^a$<br>final<br>kcal/mol |                                          |                                                        |                                 |                     |
| Naproxen   | -13,01                                 | -3,19                              | -54,75                              | -70,95                              | -21,30                                   | 120,53                                                 | -170,18                         | 0                   |
| Ketoprofen | -11,50                                 | -3,66                              | -69,72                              | -84,88                              | -39,75                                   | 120,53                                                 | -165,66                         | 1,1                 |
| Ibuprofen  | -11,16                                 | -3,52                              | -71,25                              | -85,93                              | -42,19                                   | 120,53                                                 | -164,27                         | 2,1                 |
| Diflunisal | -10,15                                 | -6,17                              | -153,64                             | -169,96                             | -126,42                                  | 120,53                                                 | -164,07                         | 2,5                 |

**Table S3.** Energy information obtained for the complexes formed by the fragment  $n_3$  of PAMAM dendrimer and 4 NSAIDs.

| drug       | complex (drug + fragment)              |                                    |                                     |                                     | drug<br>$\Delta H_f$<br>drug<br>kcal/mol | fragment $n_3$<br>$\Delta H_f$<br>fragment<br>kcal/mol | interaction energy <sup>b</sup> | experimental values |
|------------|----------------------------------------|------------------------------------|-------------------------------------|-------------------------------------|------------------------------------------|--------------------------------------------------------|---------------------------------|---------------------|
|            | dispersion<br>contribution<br>kcal/mol | h-bond<br>contribution<br>kcal/mol | $\Delta H_f$<br>complex<br>kcal/mol | $\Delta H_f^a$<br>final<br>kcal/mol |                                          |                                                        |                                 |                     |
| Naproxen   | -13,89                                 | -3,57                              | 183,34                              | 165,88                              | -21,30                                   | 296,41                                                 | -109,22                         | 0                   |
| Ketoprofen | -13,78                                 | -5,59                              | 177,56                              | 158,19                              | -42,19                                   | 296,41                                                 | -96,03                          | 1,1                 |
| Ibuprofen  | -13,78                                 | -6,70                              | 97,69                               | 77,21                               | -126,42                                  | 296,41                                                 | -92,77                          | 2,1                 |
| Diflunisal | -13,30                                 | -3,91                              | 182,46                              | 165,25                              | -39,75                                   | 296,41                                                 | -91,41                          | 2,5                 |

**Table S4.** Energy information obtained for the complexes formed by the fragment  $n_4$  of PAMAM dendrimer and 4 NSAIDs.

| drug       | complex (drug + fragment)              |                                    |                                     |                                     | drug<br>$\Delta H_f$<br>drug<br>kcal/mol | fragment $n_4$<br>$\Delta H_f$<br>fragment<br>kcal/mol | interaction energy <sup>b</sup> | experimental values |
|------------|----------------------------------------|------------------------------------|-------------------------------------|-------------------------------------|------------------------------------------|--------------------------------------------------------|---------------------------------|---------------------|
|            | dispersion<br>contribution<br>kcal/mol | h-bond<br>contribution<br>kcal/mol | $\Delta H_f$<br>complex<br>kcal/mol | $\Delta H_f^a$<br>final<br>kcal/mol |                                          |                                                        |                                 |                     |
| Naproxen   | -15,52                                 | -4,45                              | 47,58                               | 27,61                               | -39,75                                   | 242,78                                                 | -175,41                         | 0                   |
| Ketoprofen | -15,36                                 | -5,42                              | 71,60                               | 50,82                               | -21,30                                   | 242,78                                                 | -170,65                         | 1,1                 |
| Ibuprofen  | -14,90                                 | -5,05                              | 53,53                               | 33,58                               | -42,19                                   | 242,78                                                 | -167,00                         | 2,1                 |
| Diflunisal | -14,26                                 | -6,70                              | -23,48                              | -44,43                              | -126,42                                  | 242,78                                                 | -160,78                         | 2,5                 |

**Table S5. Energy information obtained for the complexes formed by the fragment n<sub>5</sub> of PAMAM dendrimer and 4 NSAIDs.**

| drug       | complex (drug + fragment)              |                                    |                            |                                       | drug<br>ΔHf<br>drug<br>kcal/mol | fragment n <sub>5</sub><br>ΔHf<br>fragment<br>kcal/mol | interaction energy <sup>b</sup> | experimental values |
|------------|----------------------------------------|------------------------------------|----------------------------|---------------------------------------|---------------------------------|--------------------------------------------------------|---------------------------------|---------------------|
|            | dispersion<br>contribution<br>kcal/mol | h-bond<br>contribution<br>kcal/mol | ΔHf<br>complex<br>kcal/mol | ΔHf <sup>a</sup><br>final<br>kcal/mol |                                 |                                                        |                                 |                     |
| Naproxen   | -39,71                                 | -4,95                              | 61,33                      | 16,66                                 | -42,19                          | 270,59                                                 | -211,74                         | 0                   |
| Ketoprofen | -38,97                                 | -5,46                              | 85,19                      | 40,76                                 | -21,30                          | 270,59                                                 | -208,53                         | 1,1                 |
| Ibuprofen  | -36,42                                 | -7,74                              | -2,46                      | -46,62                                | -126,42                         | 270,59                                                 | -190,79                         | 2,1                 |
| Diflunisal | -36,29                                 | -4,73                              | 85,30                      | 44,28                                 | -39,75                          | 270,59                                                 | -186,57                         | 2,5                 |

**Table S6. Energy information obtained for the complexes formed by the fragment n<sub>6</sub> of PAMAM dendrimer and 4 NSAIDs.**

| drug       | complex (drug + fragment)              |                                    |                            |                                       | drug<br>ΔHf<br>drug<br>kcal/mol | fragment n <sub>6</sub><br>ΔHf<br>fragment<br>kcal/mol | interaction energy <sup>b</sup> | experimental values |
|------------|----------------------------------------|------------------------------------|----------------------------|---------------------------------------|---------------------------------|--------------------------------------------------------|---------------------------------|---------------------|
|            | dispersion<br>contribution<br>kcal/mol | h-bond<br>contribution<br>kcal/mol | ΔHf<br>complex<br>kcal/mol | ΔHf <sup>a</sup><br>final<br>kcal/mol |                                 |                                                        |                                 |                     |
| Naproxen   | -37,01                                 | -4,96                              | 470,63                     | 428,66                                | -39,75                          | 725,78                                                 | -257,37                         | 0                   |
| Ketoprofen | -35,99                                 | -4,16                              | 512,84                     | 472,69                                | -21,30                          | 725,78                                                 | -231,79                         | 1,1                 |
| Ibuprofen  | -35,85                                 | -7,81                              | 502,00                     | 458,33                                | -42,19                          | 725,78                                                 | -225,26                         | 2,1                 |
| Diflunisal | -35,13                                 | -4,18                              | 417,54                     | 378,24                                | -126,42                         | 725,78                                                 | -221,12                         | 2,5                 |

**Table S7. Energy information obtained for the complexes formed by the fragment n<sub>7</sub> of PAMAM dendrimer and 4 NSAIDs.**

| drug       | complex (drug + fragment)              |                                    |                            |                                       | drug<br>ΔHf<br>drug<br>kcal/mol | fragment n <sub>7</sub><br>ΔHf<br>fragment<br>kcal/mol | interaction energy <sup>b</sup> | experimental values |
|------------|----------------------------------------|------------------------------------|----------------------------|---------------------------------------|---------------------------------|--------------------------------------------------------|---------------------------------|---------------------|
|            | dispersion<br>contribution<br>kcal/mol | h-bond<br>contribution<br>kcal/mol | ΔHf<br>complex<br>kcal/mol | ΔHf <sup>a</sup><br>final<br>kcal/mol |                                 |                                                        |                                 |                     |
| Naproxen   | -48,80                                 | -9,31                              | 312,96                     | 254,85                                | -39,75                          | 486,57                                                 | -191,97                         | 0                   |
| Ketoprofen | -47,20                                 | -7,47                              | 330,56                     | 275,88                                | -21,30                          | 486,57                                                 | -189,38                         | 1,1                 |
| Ibuprofen  | -46,99                                 | -8,86                              | 311,70                     | 255,86                                | -42,19                          | 486,57                                                 | -188,52                         | 2,1                 |
| Diflunisal | -46,24                                 | -7,37                              | 227,95                     | 174,34                                | -126,42                         | 486,57                                                 | -185,80                         | 2,5                 |

**Table S8. Energy information obtained for the complexes formed by the fragment n<sub>8</sub> of PAMAM dendrimer and 4 NSAIDs.**

| drug       | complex (drug + fragment)              |                                    |                            |                                       | drug<br>ΔHf<br>drug<br>kcal/mol | fragment n <sub>8</sub><br>ΔHf<br>fragment<br>kcal/mol | interaction energy <sup>b</sup> | experimental values |
|------------|----------------------------------------|------------------------------------|----------------------------|---------------------------------------|---------------------------------|--------------------------------------------------------|---------------------------------|---------------------|
|            | dispersion<br>contribution<br>kcal/mol | h-bond<br>contribution<br>kcal/mol | ΔHf<br>complex<br>kcal/mol | ΔHf <sup>a</sup><br>final<br>kcal/mol |                                 |                                                        |                                 |                     |
| Naproxen   | -59,59                                 | -13,66                             | 320,29                     | 247,04                                | -39,75                          | 644,24                                                 | -357,45                         | 0                   |
| Ketoprofen | -58,72                                 | -10,78                             | 338,28                     | 268,78                                | -21,30                          | 644,24                                                 | -354,17                         | 1,1                 |
| Ibuprofen  | -58,12                                 | -9,90                              | 321,40                     | 253,38                                | -42,19                          | 644,24                                                 | -348,68                         | 2,1                 |
| Diflunisal | -57,35                                 | -10,56                             | 242,95                     | 175,04                                | -126,42                         | 644,24                                                 | -342,78                         | 2,5                 |

<sup>a</sup> Final heat of formation is formed by the heat of formation for the complex (ΔHf<sub>complex</sub>) plus the contributions of dispersion and H-bond.

<sup>b</sup> Interaction energy is calculated as :  $\Delta Hf_{\text{complex}} - (\Delta Hf_{\text{fragment}} + \Delta Hf_{\text{drug}})$
